# Supplementary material for: Age Interactions in the Development of Naturally Acquired Immunity to Plasmodium falciparum and Its Clinical Presentation
Source: PLoS Med. 2007 Jul 31;4(7):e242. doi: 10.1371/journal.pmed.0040242 (PMC1950208; doi:10.1371/journal.pmed.0040242)
Supplement: Protocol S1 — (85 KB DOC) [file pmed.0040242.sd001.doc]

## Poisson model of small intervals of time with bayesian autoregressive constrains

Let be number of episodes in each age and chemoprophylaxis group combination.We assume it follows a Poisson distribution with mean . We define the linear part of the model as:

where the offset is the person time at risk, is a constant term. is a random effect for age, is the effect for the chemoprophylaxis at that age.

The is the variable that codifies the age as months of 28 days ranged from 1 for age 2 months up to 51 for the children with the longest follow-up. The is a dummy variable with value 0 for the placebo group and 1 for the group that received the chemoprohpylaxis with DeltaprimTM.

The prior for follows a normal distribution with mean 0 and precision 0.01

The term is modeled as a mean value plus a random effect ­ as:

The prior follows a normal distribution with mean 0 and precision . The autocorrelation is introduced in the definition of the mean values for the priors of to which are defined as

with a precision of . The is a term that models the correlation with the previous value of . The has as prior an uniform distribution ranged from -1 to 1 .

Following the same approach, the term is also modeled as a random effect with an autocorrelation prior

The prior follows a normal distribution with mean 0 and precision . The priors of to are defined as with a precision . The has as prior an uniform distribution ranged from -1 to 1.

The and have as prior a gamma distribution with parameters 0.1 and 0.1.

is defined as and is defined as

The main interest of this analysis is on the relative risk for a given which is defined as :

We present the mean value and 95% Credible Intervals (CI) from the posterior distribution of 20000 iterations after a burn in of 15000 iterations.

## Cumulative Rate

The cumulative rate at month is calculated as the sum of the average incidence until month $t$ using the following formula:

where is the estimated number of episodes in from the model described above, is the person time at risk in days for the and is the time interval for which is 28 days.
